# Supplementary material for: Can we predict which patients with plantar heel pain are more likely to benefit from insoles? a secondary exploratory analysis of a randomized controlled trial
Source: Research Square preprint supplement (doi:10.21203/rs.3.rs-459017/v1), 2021-05-05
Supplement: Supplementary file 1 [file 4fcee9b74ebfdf90cd5c5e4e.docx]

| Appendix | Linear regression analyses of factors associated with FFI total score at 26 weeks follow-up in the total population (N=185). | |
| --- | --- | --- |
| Variables | | **Multivariate Unstandardized β (95% CI)** |
| Body Mass Index (kg/m2) | | 0.69 (-0.06, 1.44) |
| Comorbidities (present) | | -3.95 (-14.04, 6.14) |
| Sex (female) | | -9.54 (-17.84, -1.25)* |
| Age (years) | | 0.28 (-1.25, 0.68) |
| Bilateral pain (no) | | -8.45 (-18.41, 1.50) |
| Neuropathic pain DN4 total score (0-10) | | -0.21 (-2.34, 1.93) |
| Upper ankle joint dorsal range of motion (degrees) | | 0.01 (-0.26, 0.28) |
| Metatarsal phalangeal joint dorsal range of motion (degrees) | | 0.07 (-0.10, 0.23) |
| Navicular drop (millimeter) | | -3.71 (-13.26, 5.85) |
| Activity score (SQUASH) | | 0.00 (0.00, 0.00) |
| Treatment group (custom insole) | | 0.70 (-7.01, 8.41) |
| Baseline FFI total score (0 - 100) | | 0.56 (0.29, 0.92)* |
| Baseline first step pain (0 – 10) | | -0.07 (-1.87, 1.74) |
| Duration of symptoms (months) | | 0.04 (-0.31, 0.39) |
| Foot posture index (supination) | | -0.99 (-13.60, 11.62) |
| Foot posture index (pronation) | | 1.42 (-7.26, 10.10) |
| * p-value <0.05 | | |
